# Supplementary material for: Bed bugs evolved unique adaptive strategy to resist pyrethroid insecticides
Source: PubMed Central journal article supplement — Sci Rep. 2013 Mar 14;3:1456. doi: 10.1038/srep01456 (PMC3596983; doi:10.1038/srep01456), 2013-03-14

**Supplementary Material**

**Title: Bed bugs evolved unique adaptive strategy to resist pyrethroid insecticides**

**Author names:** Fang Zhu, Hemant Gujar, Jennifer R. Gordon Kenneth F. Haynes, Michael F.

Potter and Subba R. Palli\*

Supplementary Table 1. Number of *Cimex lectularius* P450 families, subfamilies and individual genes in each insect P450 clan

| Number          | CYP2                              | Mitochondrial                  | CYP3                   | CYP4     | Total |
|-----------------|-----------------------------------|--------------------------------|------------------------|----------|-------|
| Family          | 6 (CYP15, 18, 303, 305, 306, 307) | 5 (CYP301, 302, 314, 315, 394) | 8 (CYP6, 395-400, 404) | 1 (CYP4) | 20    |
| Subfamily       | 6                                 | 6                              | 11                     | 5        | 28    |
| Individual gene | 6                                 | 6                              | 23                     | 7        | 42    |

Supplementary Table 2. Annotation and differential expression of P450s in susceptible and resistant bed bug populations

| No. | Clan | Sequence Name  | Length (nt) | Gene name | Relative expression/rpl8 |                    |                |
|-----|------|----------------|-------------|-----------|--------------------------|--------------------|----------------|
|     |      |                |             |           | LA-1 (Mean±SE)           | CIN-1 NS (Mean±SE) | NY-1 (Mean±SE) |
| 1   | 2    | GF6M21K05FYWJI | 267         | CYP15A1   | 0.096±0.02               | 0.072±0.01         | 0.051±0.00     |
| 2   | 2    | contig04179    | 1501        | CYP18A1   | 0.254±0.01               | 0.152±0.02         | 0.172±0.02     |
| 3   | 2    | FTWEJGT01DYMNN | 480         | CYP303A1  | 0.053±0.01               | 0.016±0.00         | 0.023±0.00     |
| 4   | 2    | contig08495    | 977         | CYP305B1  | 0.143±0.03               | 0.090±0.01         | 0.062±0.01     |
| 5   | 2    | contig09685    | 877         | CYP306A1  | 0.058±0.01               | 0.054±0.00         | 0.082±0.01     |
| 6   | 2    | contig01282    | 2371        | CYP307B1  | 1.731±0.22               | 1.327±0.11         | 1.944±0.13     |
| 7   | Mito | contig03102    | 1725        | CYP301A1  | 0.017±0.00               | 0.017±0.00         | 0.024±0.00     |
| 8   | Mito | contig03015    | 1742        | CYP301B1  | 0.403±0.06               | 0.357±0.01         | 0.390±0.01     |
| 9   | Mito | contig10417    | 819         | CYP302A1  | 0.132±0.02               | 0.118±0.00         | 0.145±0.01     |
| 10  | Mito | contig01141    | 2464        | CYP314A1  | 0.658±0.09               | 0.528±0.02         | 0.747±0.08     |
| 11  | Mito | FTWEJGT02G37T9 | 480         | CYP315A1  | 0.167±0.02               | 0.107±0.01         | 0.194±0.02     |
| 12  | Mito | contig02495    | 1880        | CYP394A1  | 0.035±0.01               | 0.010±0.00         | 0.007±0.00     |
| 13  | 3    | contig11249    | 762         | CYP395A1  | 1.609±0.09               | 1.963±0.27         | 1.289±0.11     |
| 14  | 3    | contig14132    | 554         | CYP395A2  | 4.133±0.25               | 4.607±0.50         | 3.038±0.46     |
| 15  | 3    | contig14522    | 531         | CYP395A3  | 2.866±0.21               | 3.318±0.30         | 2.381±0.34     |
| 16  | 3    | contig07081    | 1114        | CYP395A4  | 0.170±0.01               | 0.100±0.02         | 0.058±0.00     |
| 17  | 3    | contig08940    | 938         | CYP395A5  | 1.011±0.16               | 0.508±0.02         | 0.787±0.01     |
| 18  | 3    | contig10838    | 792         | CYP395A6  | 1.019±0.12               | 0.935±0.06         | 1.502±0.13     |
| 19  | 3    | contig02337    | 1925        | CYP395A7  | 0.033±0.01               | 0.012±0.00         | 0.012±0.00     |
| 20  | 3    | contig07631    | 1054        | CYP395A8  | 1.095±0.05               | 0.806±0.09         | 1.159±0.11     |
| 21  | 3    | contig08655    | 963         | CYP395B1  | 0.541±0.06               | 0.518±0.05         | 0.769±0.15     |
| 22  | 3    | contig03201    | 1704        | CYP396A1  | 0.001±0.00               | 0.001±0.00         | 0.001±0.00     |
| 23  | 3    | contig11345    | 752         | CYP397A1  | 6.788±0.56               | 16.718±2.09        | 29.863±4.71    |
| 24  | 3    | contig03764    | 1591        | CYP398A1  | 2.364±0.13               | 1.556±0.07         | 5.550±0.63     |
| 25  | 3    | contig02971    | 1757        | CYP399A1  | 1.170±0.11               | 0.737±0.01         | 1.120±0.10     |
| 26  | 3    | contig09058    | 927         | CYP400A1  | 0.342±0.07               | 0.308±0.06         | 0.851±0.04     |
| 27  | 3    | FTWEJGT02GUA4S | 464         | CYP404    | 0.002±0.00               | 0.001±0.00         | 0.004±0.00     |
| 28  | 3    | contig06517    | 1175        | CYP6DL1   | 0.980±0.13               | 0.845±0.04         | 0.907±0.28     |
| 29  | 3    | contig18189    | 318         | CYP6DL2   | 0.112±0.01               | 0.097±0.01         | 0.031±0.01     |
| 30  | 3    | contig08845    | 941         | CYP6DM1   | 0.238±0.03               | 0.233±0.03         | 0.263±0.01     |
| 31  | 3    | contig02437    | 1896        | CYP6DM2   | 0.888±0.14               | 1.169±0.04         | 1.359±0.30     |
| 32  | 3    | contig04490    | 1460        | CYP6DN1   | 0.653±0.19               | 0.788±0.06         | 1.551±0.11     |
| 33  | 3    | contig04426    | 1469        | CYP6DN2   | 0.716±0.05               | 0.700±0.12         | 0.172±0.00     |
| 34  | 3    | contig07269    | 1092        | CYP6DN3   | 0.991±0.11               | 0.784±0.11         | 1.446±0.10     |
| 35  | 3    | contig03136    | 1718        | CYP6DN4   | 0.343±0.05               | 0.255±0.02         | 0.111±0.01     |
| 36  | 4    | contig04099    | 1524        | CYP4CM1   | 0.301±0.01               | 0.635±0.10         | 1.278±0.12     |
| 37  | 4    | contig02986    | 1755        | CYP4CN1   | 0.524±0.05               | 0.514±0.02         | 0.382±0.03     |
| 38  | 4    | contig03005    | 1748        | CYP4CP1   | 0.251±0.04               | 0.289±0.02         | 0.318±0.02     |

---

|    |   |             |      |         |            |            |            |
|----|---|-------------|------|---------|------------|------------|------------|
| 39 | 4 | contig01154 | 2455 | CYP4CQ1 | 0.492±0.09 | 0.141±0.02 | 0.144±0.01 |
| 40 | 4 | contig02002 | 2037 | CYP4G52 | 0.601±0.09 | 0.528±0.01 | 0.665±0.01 |
| 41 | 4 | contig03206 | 1705 | CYP4G53 | 0.027±0.01 | 0.019±0.00 | 0.027±0.00 |
| 42 | 4 | contig02404 | 1905 | CYP4G54 | 0.085±0.01 | 0.083±0.01 | 0.119±0.01 |

---

Supplementary Table 3. Annotation and differential expression of esterases, GST, cuticular proteins, and Abc transporters in susceptible and resistant bed bug populations

| Category          | Contig Number | Sequence Length (nt) | Gene Name | Relative expression/rpl8 |                 |                  |
|-------------------|---------------|----------------------|-----------|--------------------------|-----------------|------------------|
|                   |               |                      |           | LA-1 Mean±SE             | CIN-1 S Mean±SE | P value (t-test) |
| Esterase          | 03262         | 1690                 | CICE21331 | 0.002±0.00               | 1.682±0.34      | <0.001           |
|                   | N/A           | N/A                  | CICE3959* | 10.098±1.70              | 9.187±1.24      | 0.421            |
| GST               | N/A           | N/A                  | GSTs1*    | 0.707±0.15               | 0.609±0.16      | 0.411            |
| Cuticular protein | 09967         | 856                  | C1        | 0.203±0.04               | 0.165±0.02      | 0.156            |
|                   | 15313         | 480                  | C2        | 0.991±0.17               | 1.474±0.12      | <0.05            |
|                   | 12749         | 648                  | C3        | 0.084±0.00               | 0.041±0.00      | <0.05            |
|                   | 12072         | 700                  | C4        | 0.012±0.00               | 0.021±0.00      | <0.05            |
|                   | 10057         | 847                  | C5        | 0.003±0.00               | 0.020±0.00      | <0.05            |
|                   | 14205         | 551                  | C6        | 0.192±0.01               | 0.127±0.00      | <0.05            |
|                   | 18423         | 308                  | C7        | 0.039±0.00               | 0.076±0.01      | <0.05            |
|                   | 09970         | 855                  | C8        | 0.010±0.00               | 0.041±0.00      | <0.05            |
|                   | 14186         | 550                  | C9        | 0.124±0.00               | 0.081±0.00      | <0.05            |
|                   | 02621         | 1840                 | C10       | 0.311±0.05               | 0.943±0.07      | <0.05            |
|                   | 12101         | 691                  | C11       | 0.007±0.00               | 0.032±0.00      | <0.05            |
|                   | 16495         | 409                  | C12       | 0.011±0.00               | 0.041±0.00      | <0.05            |
|                   | 08158         | 1004                 | C13       | 0.748±0.03               | 2.653±0.11      | <0.05            |
|                   | 14441         | 537                  | C14       | 0.067±0.00               | 0.086±0.01      | <0.05            |
|                   | 06115         | 1223                 | C15       | 0.028±0.00               | 0.038±0.00      | <0.05            |
| Abc transporter   | N/A           | N/A                  | Abc1**    | 0.106±0.01               | 0.197±0.02      | 0.001            |
|                   | 04658         | 1420                 | Abc2      | 0.711±0.05               | 0.013±0.00      | <0.001           |
|                   | 16653         | 400                  | Abc3      | 0.618±0.05               | 0.888±0.07      | 0.006            |
|                   | 09770         | 871                  | Abc4      | 0.954±0.02               | 0.883±0.07      | 0.167            |
|                   | 04780         | 1404                 | Abc5      | 1.017±0.04               | 1.061±0.04      | 0.192            |
|                   | 01139         | 2453                 | Abc6      | 0.273±0.00               | 0.226±0.00      | 0.001            |
|                   | 06994         | 1124                 | Abc7      | 0.025±0.02               | 0.083±0.00      | <0.001           |
|                   | 08506         | 976                  | Abc8      | 0.138±0.01               | 0.438±0.01      | <0.001           |
|                   | 02154         | 1984                 | Abc9      | 0.258±0.01               | 0.526±0.04      | <0.001           |
|                   | 05955         | 1243                 | Abc10     | 0.253±0.01               | 1.074±0.02      | <0.001           |
|                   | 09403         | 902                  | Abc11     | 0.253±0.01               | 0.831±0.04      | <0.001           |
|                   | 14750         | 514                  | Abc12     | 0.318±0.05               | 0.308±0.01      | 0.742            |
|                   | 14756         | 514                  | Abc13     | 0.027±0.00               | 0.032±0.00      | 0.033            |

\* Transcriptional expression of these genes was reported by Adelman et al., 2011 [18]

\*\*Differential expression between insecticide resistant and susceptible strains was reported by Mamidala et al., 2012 [20]

Supplementary Table 4. The distribution of haplotypes representing mutations in sodium channel gene of 24 bed bug populations

| <b>No.</b> | <b>Name</b> | <b>Location</b> | <b>Collect Time</b> | <b>Haplotype</b> |
|------------|-------------|-----------------|---------------------|------------------|
| 1          | LA-1        | Los Angeles, CA | Aug 14 2006         | A                |
| 2          | LEX-7       | Lexington, KY   | Dec 21 2011         | D/C              |
| 3          | LEX-3       | Lexington, KY   | Nov 10 2011         | A                |
| 4          | LEX-10      | Lexington, KY   | Jan 10 2012         | C                |
| 5          | LEX-4       | Lexington, KY   | Nov 30 2011         | A                |
| 6          | NY-1        | Plainview, NY   | Early 2008          | C                |
| 7          | LEX-1       | Lexington, KY   | Nov 18 2011         | A                |
| 8          | LEX-12      | Lexington, KY   | Feb 14 2012         | B                |
| 9          | CIN-1 S     | Cincinnati, OH  | Dec 2 2011          | A                |
| 10         | LEX-9       | Lexington, KY   | Jan 9 2012          | B                |
| 11         | LEX-13      | Lexington, KY   | Feb 17 2012         | C                |
| 12         | LEX-11      | Lexington, KY   | Dec 22 2011         | B                |
| 13         | LEX-5       | Lexington, KY   | Dec 2 2011          | D                |
| 14         | LEX-6       | Lexington, KY   | Dec 21 2011         | B/C              |
| 15         | CHI-1       | Chicago, IL     | Jan 3 2012          | B                |
| 16         | CHI-2       | Chicago, IL     | Jan 3 2012          | C                |
| 17         | CIN-5       | Cincinnati, OH  | Jan 3 2012          | C                |
| 18         | LEX-2       | Lexington, KY   | Nov 10 2011         | D                |
| 19         | LEX-8       | Lexington, KY   | Jan 9 2012          | C                |
| 20         | CHI-3       | Chicago, IL     | Jan 3 2012          | B                |
| 21         | LOU-1       | Louisville, KY  | Dec 21 2011         | B                |
| 22         | LOU-2       | Louisville, KY  | Dec 21 2011         | D/C              |
| 23         | CIN-4       | Cincinnati, OH  | Jan 3 2012          | C                |
| 24         | CIN-3       | Cincinnati, OH  | Dec 19 2011         | C                |

Supplementary Table 5. Primers used for dASPCR, qRT-PCR, and RNAi

| Category         | Gene Name      | Sequence Name | Length (nt)    | Primer Name    | Function                          | Sequence                           |
|------------------|----------------|---------------|----------------|----------------|-----------------------------------|------------------------------------|
| Cytochrome P450s | GF6M21K05FYWJI | 267           | CYP15A1        | qCle_cyp15a1F  | qRT-PCR                           | 5' GGAAGTACACAGAAACCCTCGT 3'       |
|                  |                |               |                | qCle_cyp15a1R  | qRT-PCR                           | 5' GCTTGCATATGGACAAAGAGCATTGGG 3'  |
|                  | contig04179    | 1501          | CYP18A1        | qCle_cyp18a1F  | qRT-PCR                           | 5' CGACAGGCAGCTGCAACAAATCAT 3'     |
|                  |                |               |                | qCle_cyp18a1R  | qRT-PCR                           | 5' TCGGGCTCGTGAAGCATGTAGATT 3'     |
|                  | FTWEJGT01DYMNN | 480           | CYP303A1       | qCle_cyp303a1F | qRT-PCR                           | 5' TGGCCTGTCTTGAAGTGTCCGGTAA 3'    |
|                  |                |               |                | qCle_cyp303a1R | qRT-PCR                           | 5' AGCAAATCGTTGGGTTTCGGCTTC 3'     |
|                  | contig08495    | 977           | CYP305B1       | qCle_cyp305b1F | qRT-PCR                           | 5' TGAGCCTGTTCTCTTTCTGTCTG 3'      |
|                  |                |               |                | qCle_cyp305b1R | qRT-PCR                           | 5' GATTGTTGCACCATCGAGCCCTTT 3'     |
|                  | contig09685    | 877           | CYP306A1       | qCle_cyp306a1F | qRT-PCR                           | 5' TGACAGGCCCTACAATGCCGATTA 3'     |
|                  |                |               |                | qCle_cyp306a1R | qRT-PCR                           | 5' TCTTACTCCATCGCAACGTGAT 3'       |
|                  | contig01282    | 2371          | CYP307B1       | qCle_cyp307b1F | qRT-PCR                           | 5' GCATGGGCTACAAGTTGACGCAAT 3'     |
|                  |                |               |                | qCle_cyp307b1R | qRT-PCR                           | 5' TTGCTCGATATTGCAAGGTT 3'         |
|                  | contig03102    | 1725          | CYP301A1       | qCle_cyp301a1F | qRT-PCR                           | 5' TGACTTCTCGACGGCAACATTCT 3'      |
|                  |                |               |                | qCle_cyp301a1R | qRT-PCR                           | 5' TGGTCAGTGAACAGAACCGAAGA 3'      |
|                  | contig03015    | 1742          | CYP301B1       | qCle_cyp301b1F | qRT-PCR                           | 5' GGCCCATTTGGCATAAACATCGGA 3'     |
|                  |                |               |                | qCle_cyp301b1R | qRT-PCR                           | 5' GTGCATTGGAAGGCGTTATGCTGA 3'     |
|                  | contig10417    | 819           | CYP302A1       | qCle_cyp302a1F | qRT-PCR                           | 5' TTACACAGAATTGGGTTGCGT 3'        |
|                  |                |               |                | qCle_cyp302a1R | qRT-PCR                           | 5' TGCGAGTCTTCTAGCGATGCATGT 3'     |
|                  | contig01141    | 2464          | CYP314A1       | qCle_cyp314a1F | qRT-PCR                           | 5' TCCAAATCGCTTCTTCCCTCACGA 3'     |
|                  |                |               |                | qCle_cyp314a1R | qRT-PCR                           | 5' GCGAACAAACAAAGCCCTTGACGAT 3'    |
|                  | FTWEJGT02G37T9 | 480           | CYP315A1       | qCle_cyp315a1F | qRT-PCR                           | 5' AGTTTCTGAACAAGGTTCGACGGGTGCA 3' |
|                  |                |               |                | qCle_cyp315a1R | qRT-PCR                           | 5' TCGAGTTGTATCGGCATTCCCTGT 3'     |
|                  | contig02495    | 1880          | CYP394A1       | qCle_cyp394a1F | qRT-PCR                           | 5' TCGCTGTGAAGTTCCTGCCAACTACAAT 3' |
|                  |                |               |                | qCle_cyp394a1R | qRT-PCR                           | 5' TGCTGACTTCGATGAGCGTGTGTA 3'     |
|                  | contig11249    | 762           | CYP395A1       | qCle_cyp395a1F | qRT-PCR                           | 5' AGGCAAACCTCATAGCGAGGCATAT 3'    |
|                  |                |               |                | qCle_cyp395a1R | qRT-PCR                           | 5' ATTCAATCCACATGGACCCGACCT 3'     |
|                  | contig14132    | 554           | CYP395A2       | qCle_cyp395a2F | qRT-PCR                           | 5' TCAGGCACATGTCCAGGTAAGTCA 3'     |
|                  |                |               |                | qCle_cyp395a2R | qRT-PCR                           | 5' ACAGGAACGAGCGAGAAATGAGGTCATA 3' |
|                  | contig14522    | 531           | CYP395A3       | qCle_cyp395a3F | qRT-PCR                           | 5' CAGGGTTGAAACCGAACCGGAAAT 3'     |
|                  |                |               |                | qCle_cyp395a3R | qRT-PCR                           | 5' AATGACCGAGATCGGCGAGAACTT 3'     |
| contig07081      | 1114           | CYP395A4      | qCle_cyp395a4F | qRT-PCR        | 5' GCCTTCGAATTAACCGCCTTCCAATT 3'  |                                    |
|                  |                |               | qCle_cyp395a4R | qRT-PCR        | 5' AGTCGTTCCCTTCGGACGTTCTTCT 3'   |                                    |
| contig08940      | 938            | CYP395A5      | qCle_cyp395a5F | qRT-PCR        | 5' ACGCTTCAGCCCTGATGATTCCAGA 3'   |                                    |
|                  |                |               | qCle_cyp395a5R | qRT-PCR        | 5' CATGAGGACCTTTGCAAGGCAGAA 3'    |                                    |
| contig10838      | 792            | CYP395A6      | qCle_cyp395a6F | qRT-PCR        | 5' TCTTTAGGGTTGAAAGGCAAGCCGTA 3'  |                                    |
|                  |                |               | qCle_cyp395a6R | qRT-PCR        | 5' TTCTCCATGGACGTGATCGGTTCT 3'    |                                    |
| contig02337      | 1925           | CYP395A7      | qCle_cyp395a7F | qRT-PCR        | 5' ACAAGGCCTCCAGTTCTCTATGCT 3'    |                                    |
|                  |                |               | qCle_cyp395a7R | qRT-PCR        | 5' TGGGTCGATGTGTTTGCACAATG 3'     |                                    |
| contig07631      | 1054           | CYP395A8      | qCle_cyp395a8F | qRT-PCR        | 5' ATTTTCATCTGCTGCAAGGCGAACCTC 3' |                                    |
|                  |                |               | qCle_cyp395a8R | qRT-PCR        | 5' TGACCCTGACAAATTCGACCCTGA 3'    |                                    |
| contig08655      | 963            | CYP395B1      | qCle_cyp395b1F | qRT-PCR        | 5' TGAACAGGTTGATGCTGAGTGGGT 3'    |                                    |
|                  |                |               | qCle_cyp395b1R | qRT-PCR        | 5' TTGTCAAGGACTTCTCCAGCTTCG 3'    |                                    |
| contig03201      | 1704           | CYP396A1      | qCle_cyp396a1F | qRT-PCR        | 5' TCGTCGTTAATGATCCCGAGCTGA 3'    |                                    |
|                  |                |               | qCle_cyp396a1R | qRT-PCR        | 5' CAAGTTGAACAGCGCTTTGGACGA 3'    |                                    |
| contig11345      | 752            | CYP397A1      | qCle_cyp397a1F | qRT-PCR        | 5' TATTGGAGTCGACAGGGCGTGAAA 3'    |                                    |
|                  |                |               | qCle_cyp397a1R | qRT-PCR        | 5' TGACATCGCCCAATTGCTTGTAGC 3'    |                                    |

|                |             |          |                |         |                                                     |
|----------------|-------------|----------|----------------|---------|-----------------------------------------------------|
|                |             |          | dCl_CYP397a1F  | RNAi    | 5' TAATACGACTCACTATAGGGTGATCTGGACATCGACATGGACC 3'   |
|                |             |          | dCl_CYP397a1R  | RNAi    | 5' TAATACGACTCACTATAGGGAGTTCGAAAACCGTCATGGCTC 3'    |
|                |             |          | qCle_cyp398a1F | qRT-PCR | 5' TGTCGACCCAATGATGGCTCTGAA 3'                      |
| contig03764    | 1591        | CYP398A1 | qCle_cyp398a1R | qRT-PCR | 5' GAAATTGGAGCCGATTTGGCGAT 3'                       |
|                |             |          | dCl_CYP398a1F  | RNAi    | 5' TAATACGACTCACTATAGGGGCGTTATTGTTTGTCTCCATGGTGG 3' |
|                |             |          | dCl_CYP398a1R  | RNAi    | 5' TAATACGACTCACTATAGGGTCGTTCTCGAAGCTACAATCAGCG 3'  |
|                |             |          | qCle_cyp399a1F | qRT-PCR | 5' TGTGGATCCAAAGCTGGAACCGAT 3'                      |
| contig02971    | 1757        | CYP399A1 | qCle_cyp399a1R | qRT-PCR | 5' AGTGTGAGTGAAGATGTGACTGCCA 3'                     |
|                |             |          | qCle_cyp400a1F | qRT-PCR | 5' CCGTTGTTCGGCAAAGACGTTGAAATCT 3'                  |
| contig09058    | 927         | CYP400A1 | qCle_cyp400a1R | qRT-PCR | 5' TATACATTCGCCAAAGCCGTCGGA 3'                      |
|                |             |          | qCle_cyp404F   | qRT-PCR | 5' TGGCGCTAAAACCCAGATAAAACAAGAA 3'                  |
| FTWEJGT02GUA4S | 464         | CYP404   | qCle_cyp404R   | qRT-PCR | 5' CGTGAAATCTCAGTACCAACCGGGTA 3'                    |
|                |             |          | qCle_cyp6dl1F  | qRT-PCR | 5' TTTCAGGCATGAATCGTCTGGGTCA 3'                     |
| contig06517    | 1175        | CYP6DL1  | qCle_cyp6dl1R  | qRT-PCR | 5' TTGAGGAAATACCCTCTGTCCCA 3'                       |
|                |             |          | qCle_cyp6dl2F  | qRT-PCR | 5' TTCAAAGGGAACCGTTATGGA 3'                         |
| contig18189    | 318         | CYP6DL2  | qCle_cyp6dl2R  | qRT-PCR | 5' CGTTCTCCATGTGGATGAGATGGT 3'                      |
|                |             |          | qCle_cyp6dm1F  | qRT-PCR | 5' CCTAGTAACTGCCCTGTACGTTT 3'                       |
| contig08845    | 941         | CYP6DM1  | qCle_cyp6dm1R  | qRT-PCR | 5' TGACAGATGTCGAGGCGAACTTCA 3'                      |
|                |             |          | qCle_cyp6dm2F  | qRT-PCR | 5' GCTACGCACTTTACGAACTGGCAATGA 3'                   |
| contig02437    | 1896        | CYP6DM2  | qCle_cyp6dm2R  | qRT-PCR | 5' TATGGCATTCTTTCGAACGCCTCG 3'                      |
|                |             |          | qCle_cyp6dn1F  | qRT-PCR | 5' GCGAGTCTGGGAAATTGTGCATGAAT 3'                    |
| contig04490    | 1460        | CYP6DN1  | qCle_cyp6dn1R  | qRT-PCR | 5' AATGCCCGATTACGATGTCAGGGA 3'                      |
|                |             |          | dCl_CYP6dn1F   | RNAi    | 5' TAATACGACTCACTATAGGGCCTCATCCGATGCAAACCTCGAGG 3'  |
|                |             |          | dCl_CYP6dn1R   | RNAi    | 5' TAATACGACTCACTATAGGGTTACAGGCCGTTTGGAAACCG 3'     |
| contig04426    | 1469        | CYP6DN2  | qCle_cyp6dn2F  | qRT-PCR | 5' CTGTTCTTGGGCAAACCGCTTCAA 3'                      |
|                |             |          | qCle_cyp6dn2R  | qRT-PCR | 5' TTTCGGGACGAAGAATAAGGGCT 3'                       |
| contig07269    | 1092        | CYP6DN3  | qCle_cyp6dn3F  | qRT-PCR | 5' TGGGACGCAAATCTTCGTATCACTCC 3'                    |
|                |             |          | qCle_cyp6dn3R  | qRT-PCR | 5' TTCCTATGCACAATCTCGGACCCT 3'                      |
| contig03136    | 1718        | CYP6DN4  | qCle_cyp6dn4F  | qRT-PCR | 5' AGAAATGTGGGCAGCCTCACTGT 3'                       |
|                |             |          | qCle_cyp6dn4R  | qRT-PCR | 5' TGTAGAAACCTCGGTGTATGGGCT 3'                      |
|                |             |          | qCle_cyp4cm1F  | qRT-PCR | 5' ATGGTAAACATTGGAGGCCCTGGA 3'                      |
| contig04099    | 1524        | CYP4CM1  | qCle_cyp4cm1R  | qRT-PCR | 5' AGAGATTTGCCTTACCACCAGCGA 3'                      |
|                |             |          | dCl_CYP4cm1F   | RNAi    | 5' TAATACGACTCACTATAGGGGTTCTGCAAAATGCACAGCTAAGG 3'  |
|                |             |          | dCl_CYP4cm1R   | RNAi    | 5' TAATACGACTCACTATAGGGGACTGAGTGCACATCAACTCAAG 3'   |
| contig02986    | 1755        | CYP4CN1  | qCle_cyp4cn1F  | qRT-PCR | 5' ATCCAACGGTGCCATTTATCGGGA 3'                      |
|                |             |          | qCle_cyp4cn1R  | qRT-PCR | 5' AATGGATGGCGTTGTGCTACGTTT 3'                      |
| contig03005    | 1748        | CYP4CP1  | qCle_cyp4cp1F  | qRT-PCR | 5' TTCATATCGGACTGCACTCTGGAC 3'                      |
|                |             |          | qCle_cyp4cp1R  | qRT-PCR | 5' TCCAAATGGAGCCAAGGTTTCTGC 3'                      |
| contig01154    | 2455        | CYP4CQ1  | qCle_cyp4cq1F  | qRT-PCR | 5' TGTTGGGATCATCTTCAGGGCTCAA 3'                     |
|                |             |          | qCle_cyp4cq1R  | qRT-PCR | 5' AACAGTTTCTTCATCGCGCCAACG 3'                      |
| contig02002    | 2037        | CYP4G52  | qCle_cyp4g52F  | qRT-PCR | 5' AGGCCTAGTGAGCTTTCTGGTGT 3'                       |
|                |             |          | qCle_cyp4g52R  | qRT-PCR | 5' TCAGAGTCAAGGAAGGCAAACCGA 3'                      |
| contig03206    | 1705        | CYP4G53  | qCle_cyp4g53F  | qRT-PCR | 5' GAACGCAGGCGCGATTAACCTTC 3'                       |
|                |             |          | qCle_cyp4g53R  | qRT-PCR | 5' TTTCACCATGGCTTGGGAAT 3'                          |
| contig02404    | 1905        | CYP4G54  | qCle_cyp4g54F  | qRT-PCR | 5' TGGCTTGGACCCAGACTAATCGT 3'                       |
|                |             |          | qCle_cyp4g54R  | qRT-PCR | 5' AAACCACGGCTGGAAGTAGCTGTA 3'                      |
| Esterase       | N/A         | N/A      | CICE3959qRTF   | qRT-PCR | 5' ACGTCTGGAGAAGGGCAACTGAAA 3'                      |
|                |             |          | CICE3959qRTR   | qRT-PCR | 5' GACGGCCGGGTAGATGAAAACAAC 3'                      |
|                | Contig03262 | 1690     | CICE21331qRTF  | qRT-PCR | 5' TCTCACGGGGACGAACTGCCTTAT 3'                      |
|                |             |          | CICE21331qRTR  | qRT-PCR | 5' CCTGGTCTTCTGGGTATTTCTTCA 3'                      |



|                    |                  |             |        | CICE21331qRTF<br>CICE21331qRTR                                       | RNAi<br>RNAi                           | 5' TAATACGACTCACTATAGGGACAGGCATGCTTACATTCTCCGA 3'<br>5' TAATACGACTCACTATAGGGTAATCTTCGTGGAGGCCGGTGAAA 3'                                                                       |                                                                  |
|--------------------|------------------|-------------|--------|----------------------------------------------------------------------|----------------------------------------|-------------------------------------------------------------------------------------------------------------------------------------------------------------------------------|------------------------------------------------------------------|
| GST                | N/A              | N/A         | GSTs1* | CIGSTS1qRTF<br>CIGSTS1qRTR                                           | qRT-PCR<br>qRT-PCR                     | 5' AGGAGAGCCAGTTAGATTTATGTT 3'<br>5' AAGCGATTCCCAACCGATTTT 3'                                                                                                                 |                                                                  |
|                    | 09967            | 856         | C1     | CIcut09967qRTF<br>CIcut09967qRTR                                     | qRT-PCR<br>qRT-PCR                     | 5' TACACATTGTTCCGACGCTTGCCTG 3'<br>5' GTCGTTGTGCCTGTTGATCTGCTT 3'                                                                                                             |                                                                  |
|                    | 15313            | 480         | C2     | CIcut15313qRTF<br>CIcut15313DsF<br>CIcut15313DsR                     | qRT-PCR<br>RNAi<br>RNAi                | 5' ACGGAACCCATCCCAGATCCTTAAA 3'<br>5' ATGCCGTTACCGGTTTCGTATTCC 3'<br>5' TAATACGACTCACTATAGGGCCAAGGAAAGCGGGCTTCGTCAA 3'<br>5' TAATACGACTCACTATAGGGAGATAGTCGAGTGCCCTCTGGAT 3'   |                                                                  |
|                    | 12749            | 648         | C3     | CIcut12749qRTF<br>CIcut12749qRTR                                     | qRT-PCR<br>qRT-PCR                     | 5' ACTTTGCTGCGCTAGTTGCTGTTG 3'<br>5' ATTTGTTGCGGTTTCATACGCC 3'                                                                                                                |                                                                  |
|                    | 12072            | 700         | C4     | CIcut12072qRTF<br>CIcut12072qRTR                                     | qRT-PCR<br>qRT-PCR                     | 5' TCTACAAAACCTGCGACTGTTGCCT 3'<br>5' AGCATAGTTGGCGTATGGAGCTGA 3'                                                                                                             |                                                                  |
|                    | 10057            | 847         | C5     | CIcut10057qRTF<br>CIcut10057qRTR                                     | qRT-PCR<br>qRT-PCR                     | 5' TTACGGAGGATACGGCTTGGGAAA 3'<br>5' ACTGCGTTCCTCACTGGAATCCT 3'                                                                                                               |                                                                  |
|                    | 14205            | 551         | C6     | CIcut14205qRTF<br>CIcut14205qRTR                                     | qRT-PCR<br>qRT-PCR                     | 5' TCCAACCTCAACCAGGTCCCAATA 3'<br>5' TACCGTTTCCGGTTTCGTAGCTGT 3'                                                                                                              |                                                                  |
|                    | 18423            | 308         | C7     | CIcut18423qRTF<br>CIcut18423qRTR                                     | qRT-PCR<br>qRT-PCR                     | 5' AACAGTCCTTGCAACCAGCATTGG 3'<br>5' GCGGTTCTAGTTTCGTGTTTGGCA 3'                                                                                                              |                                                                  |
| Cuticular proteins | 09970            | 855         | C8     | CIcut09970qRTF<br>CIcut09970qRTR                                     | qRT-PCR<br>qRT-PCR                     | 5' AAATCTGTCGCTGTCCAGCTGTA 3'<br>5' TTTGTTTCCATGGGCGTCTTGGTG 3'                                                                                                               |                                                                  |
|                    | 14186            | 550         | C9     | CIcut14186qRTF<br>CIcut14186qRTR                                     | qRT-PCR<br>qRT-PCR                     | 5' GTCTCGCAAGCAAACCAACATGA 3'<br>5' TGGTCTGGACAAGGTTTGGCGTTA 3'                                                                                                               |                                                                  |
|                    | 02621            | 1840        | C10    | CIcut02621qRTF<br>CIcut02621qRTR<br>CIcut02621dsRF<br>CIcut02621dsRR | qRT-PCR<br>qRT-PCR<br>RNAi<br>RNAi     | 5' ACTCCTGAAGTCCAAGCAGCAAGA 3'<br>5' TCGGAAGGGTTGTCCAAATCGTGA 3'<br>5' TAATACGACTCACTATAGGGAGTACCACAATGGGTCATCAGGCA 3'<br>5' TAATACGACTCACTATAGGGACAGCGGCAACTGGTATATCTCTCT 3' |                                                                  |
|                    | 12101            | 691         | C11    | CIcut12101qRTF<br>CIcut12101qRTR                                     | qRT-PCR<br>qRT-PCR                     | 5' AGTACGCAACAATTCTGGGAGGCA 3'<br>5' TGGCAGCATGGTAGTTGATCGGA 3'                                                                                                               |                                                                  |
|                    | 16495            | 409         | C12    | CIcut16495qRTF<br>CIcut16495qRTR                                     | qRT-PCR<br>qRT-PCR                     | 5' ACTCAGGAAGAGTCTCGTATCGGT 3'<br>5' CTGAACATGGGCATTGAAGCCTGT 3'                                                                                                              |                                                                  |
|                    | 8158             | 1004        | C13    | CIcut08158qRTF<br>CIcut08158dsRF<br>CIcut08158dsRR                   | qRT-PCR<br>RNAi<br>RNAi                | 5' CCAAGCGGTCAAAGCAGCACATTT 3'<br>5' AGCCTAGCGAGAGCTTGGTTGTAA 3'<br>5' TAATACGACTCACTATAGGGACAGCCGATCGGGTTACTATTGGT 3'<br>5' TAATACGACTCACTATAGGGAAATTGTACGCTCTGGCTTGGCG 3'   |                                                                  |
|                    | 14441            | 537         | C14    | CIcut14441qRTF<br>CIcut14441qRTR                                     | qRT-PCR<br>qRT-PCR                     | 5' ATCCCAGACAGTCTGAAGTGGAA 3'<br>5' TTATTGAGACAGCGGAGTTTGGC 3'                                                                                                                |                                                                  |
|                    | 06115            | 1223        | C15    | CIcut06115qRTF<br>CIcut06115qRTR                                     | qRT-PCR<br>qRT-PCR                     | 5' ACGGTCAAGCACCTGTCTCAGATT 3'<br>5' AGACTGAAGCCGGAGCTTTGTGTA 3'                                                                                                              |                                                                  |
|                    | Abc transporters | N/A         | N/A    | Abc1**                                                               | BBABCTransporterF<br>BBABCTransporterR | qRT-PCR<br>qRT-PCR                                                                                                                                                            | 5' TGCTTACATAAATCTGACAT 3'<br>5' GTAGGACGGTATGAGGTA 3'           |
|                    |                  | contig04658 | 1420   | Abc2                                                                 | CIABCT04658F<br>CIABCT04658R           | qRT-PCR<br>qRT-PCR                                                                                                                                                            | 5' TCGTTGCCACAGGGTTATGACACA 3'<br>5' TGGAGTCAAGAGCAGAAGTTGCCT 3' |
| contig16653        |                  | 400         | Abc3   | CIABCT16653F<br>CIABCT16653R                                         | qRT-PCR<br>qRT-PCR                     | 5' AACCAGGAAAGTCTGTCGCTTTGG 3'<br>5' CGTAGAAAACGCAGTAGCAAACCTACG 3'                                                                                                           |                                                                  |
| contig09770        |                  | 871         | Abc4   | CIABCT09770F<br>CIABCT09770R                                         | qRT-PCR<br>qRT-PCR                     | 5' AAGACAGGAAGGTGTGCGAGAAGT 3'<br>5' CAAGCATGGCGTTAATTCCGGTGT 3'                                                                                                              |                                                                  |
| contig04780        |                  | 1404        | Abc5   | CIABCT04780F<br>CIABCT04780R                                         | qRT-PCR<br>qRT-PCR                     | 5' CAACCTCGCTTGCCATGTCTTCAA 3'<br>5' TTGTCGATGCCGAGCCAAAGTACA 3'                                                                                                              |                                                                  |

|                |        |                                 |                                                                |                                    |                                                                                                                                                                           |
|----------------|--------|---------------------------------|----------------------------------------------------------------|------------------------------------|---------------------------------------------------------------------------------------------------------------------------------------------------------------------------|
| contig01139    | 2453   | Abc6                            | CIABCT01139F<br>CIABCT01139R                                   | qRT-PCR<br>qRT-PCR                 | 5' ACTAAGCGCCAGCAAGGAAATGTG 3'<br>5' TTGGAGCTATCGAATCCCAGGCA 3'                                                                                                           |
| contig06994    | 1124   | Abc7                            | CIABCT06994F<br>CIABCT06994R                                   | qRT-PCR<br>qRT-PCR                 | 5' TTCAACATCCACCGAGTATGCCCT 3'<br>5' TTGTACCTCTTGGCAGGGTCATGT 3'                                                                                                          |
| contig08506    | 976    | Abc8                            | CIABCT08506F<br>CIABCT08506R<br>dCIABCT08506F<br>dCIABCT08506R | qRT-PCR<br>qRT-PCR<br>RNAi<br>RNAi | 5' ATCCTGATGGGCCGAGTAAACCAT 3'<br>5' TTCTGGAGGTGACCGTCAAGTTGT 3'<br>5' TAATACGACTCACTATAGGGCCTATTTTGTAGCCTGTTTGG 3'<br>5' TAATACGACTCACTATAGGGGATGGGTGAATGGAATGACTG 3'    |
| contig02154    | 1984   | Abc9                            | CIABCT02154F<br>CIABCT02154R<br>dCIABCT02154F<br>dCIABCT02154R | qRT-PCR<br>qRT-PCR<br>RNAi<br>RNAi | 5' TTTAGCAACCGATGTGACGCAAGC 3'<br>5' TGACCCAGACGTTGTCAACACAGA 3'<br>5' TAATACGACTCACTATAGGGATGGGTTTGTTCATATCCTGCG 3'<br>5' TAATACGACTCACTATAGGGCGTCGAGAGGAAAATCAAAGTCC 3' |
| contig05955    | 1243   | Abc10                           | CIABCT05955F<br>CIABCT05955R                                   | qRT-PCR<br>qRT-PCR                 | 5' TCACAGCGGTCTTCCTGGATTCTT 3'<br>5' AACTTCTGCGCGCACATTAGAACG 3'                                                                                                          |
| contig09403    | 902    | Abc11                           | CIABCT09403F<br>CIABCT09403R                                   | qRT-PCR<br>qRT-PCR                 | 5' ATGCAGCTCAGTAGGGTTCGCTTT 3'<br>5' CGGGCCAAAGTCAAATCAGCACAT 3'                                                                                                          |
| contig14750    | 514    | Abc12                           | CIABCT14750F<br>CIABCT14750R                                   | qRT-PCR<br>qRT-PCR                 | 5' ATTTGCGGCTTATAGATCGCACGC 3'<br>5' TTTGCCGAGTGGTATCGGTAGGT 3'                                                                                                           |
| contig14756    | 514    | Abc13                           | CIABCT14756F<br>CIABCT14756R                                   | qRT-PCR<br>qRT-PCR                 | 5' TGTCGAGACATTGAGTGGAGGACA 3'<br>5' CGACTGTCGGCTCATCCAAGATTA 3'                                                                                                          |
| Sodium channel |        |                                 | BBParaF1                                                       | 1 <sup>st</sup> PCR                | 5' AACCTGGATATACATGCCTTCAAGG 3'                                                                                                                                           |
|                |        |                                 | BBParaR1                                                       | 1 <sup>st</sup> PCR, dASPCR        | 5' TGATGGAGATTTTGCCACTGATG 3'                                                                                                                                             |
|                |        |                                 | BBParaF3                                                       | 1 <sup>st</sup> PCR                | 5' GGAATTGAAGCTGCCATGAAGTTG 3'                                                                                                                                            |
|                |        |                                 | BBParaR3                                                       | 1 <sup>st</sup> PCR, dASPCR        | 5' TGCCTATTCTGTCGAAAAGCCTCAG 3'                                                                                                                                           |
|                |        |                                 | BBParaF1-AS                                                    | dASPCR                             | 5' ATTCCTGGGATCATTCTACCTCG 3'                                                                                                                                             |
|                |        |                                 | BBParaF1-AS1                                                   | dASPCR                             | 5' ATTCCTGGGATCATTCTACCTCC 3'                                                                                                                                             |
|                |        |                                 | BBParaF3-AS                                                    | dASPCR                             | 5' ATTATGGGCAGAACAGTGGGTGCCC 3'                                                                                                                                           |
| BBParaF3-AS1   | dASPCR | 5' ATTATGGGCAGAACAGTGGGTGCCA 3' |                                                                |                                    |                                                                                                                                                                           |

\* Transcriptional expression of these genes was reported by Adelman et al., 2011 [18]

\*\*Differential expression between insecticide resistant and susceptible strains was reported by Mamidala et al., 2012 [20]

**Supplementary Figure 1. Flowchart for transcriptomic analysis of *C. lectularius* sequences.**

Ten  $\mu\text{g}$  of CIN-1 NS strain cDNA was used for 454 pyrosequencing using Genome Sequencer FLX system (Roche-applied-science) available at Advanced Genomics Technology Center of University of Kentucky (<http://www.uky.edu/Centers/AGTC/>). The high quality reads from Roche 454 pyrosequencing were combined with four groups of expressed sequence tag (EST) resources in NCBI database including SRX028107 (Accession No.), SRX013985, SRX013984 and 7131 ESTs. Then these data was assembled through Roche *de novo* Assembler program (Newbler).

**Supplementary Figure 2. Summary of *C. lectularius* transcriptomic sequences.** The length distribution of *C. lectularius* transcript sequences: (A) contigs; (B) singletons.

**Supplementary Figure 3. Gene ontology (GO) terms for the transcriptomic sequences of *C. lectularius*.** (A) molecular function; (B) biological process; (C) cellular component.

**Supplementary Figure 4. Spatial expression of resistance associated genes in CIN1 NS strain.** The head (H), leg (L), gut (foregut and midgut) (G), fat body (F), mesospermalege (M), ovary (O), and integument (I) were dissected from 1 week-old female adult CIN-1 NS bed bugs. The mRNA levels of 12 target genes were quantified by qRT-PCR. Relative mRNA levels were normalized using the mRNA levels of *rpl8*. The data shown are mean + SEM (n = 3). There was no significant difference among relative expression within samples with the same alphabetic letter (i.e. a, b and c) (One-way ANOVA followed by Duncan multiple mean separation, SAS v9.4).

**Supplementary Figure 5. The geographic distribution of 21 bed bug field populations collected from the United States.** The red point represents the cities where these bed bug populations collected. These four cities belong to three states, Kentucky, Illinois, and Ohio.

**Supplementary Figure 6. Effect of RNAi on cytochrome P450 gene expression 6 days after injection of dsRNA of control *malE* or target P450s mix into CIN-1 S strain.** Knockdown efficiency of four target P450s (*CYP397A1*, *CYP398A1*, *CYP4CM1*, and *CYP6DNI*) and three non-target P450s (*CYP399A1*, *CYP4CN1*, *CYP6DM1*) are shown. The results are expressed as mean+SEM (n = 6) as a ratio in comparison with the mRNA levels of *rpl8*. Means labeled with double asterisks (\*\*) represent the significant difference in relative mRNA expression level between control and target P450s RNAi treatment (P450s-KD) (Student t-test,  $P < 0.01$ ).

**Figure 1S**

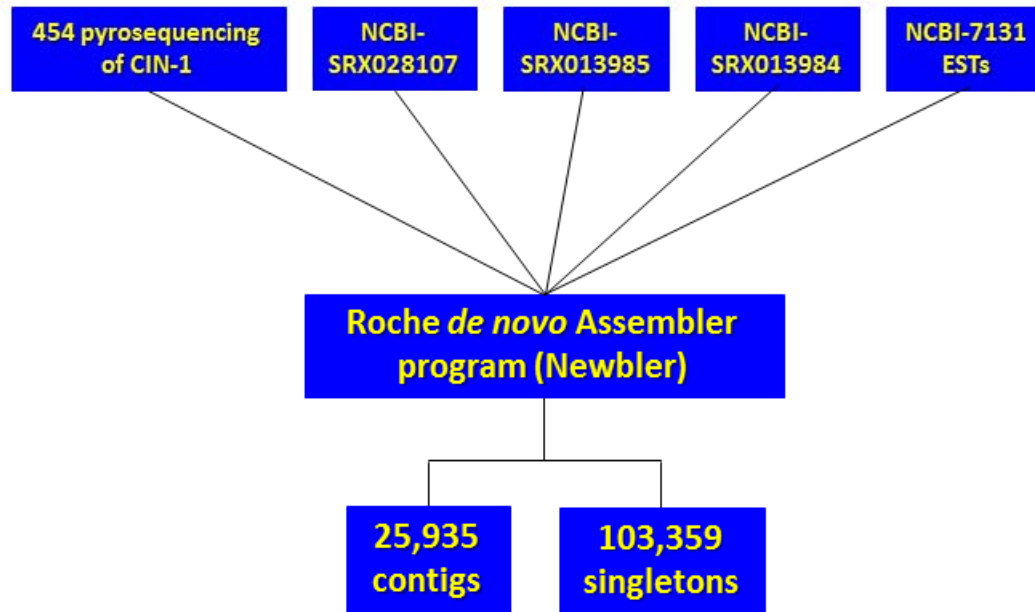

Figure 2S A

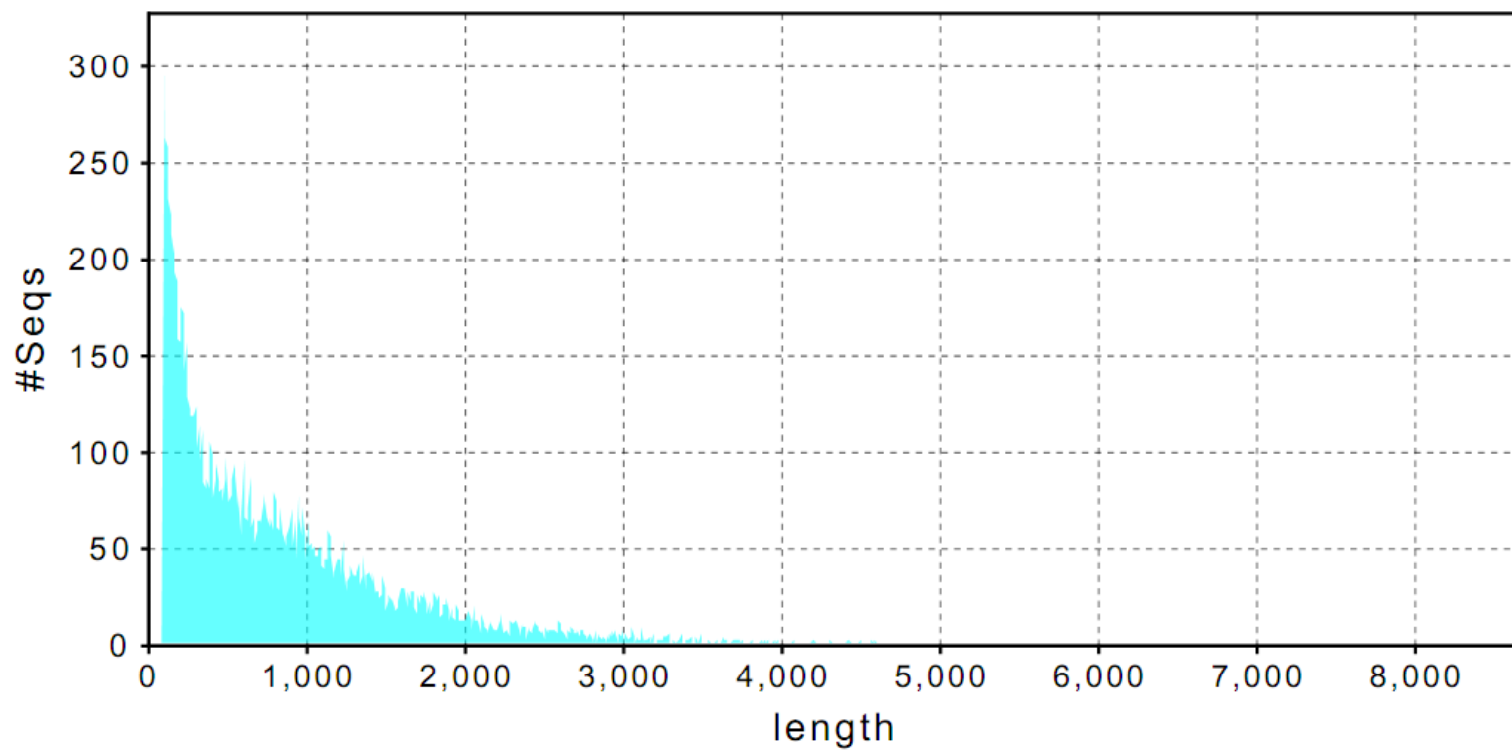

Figure 2S B

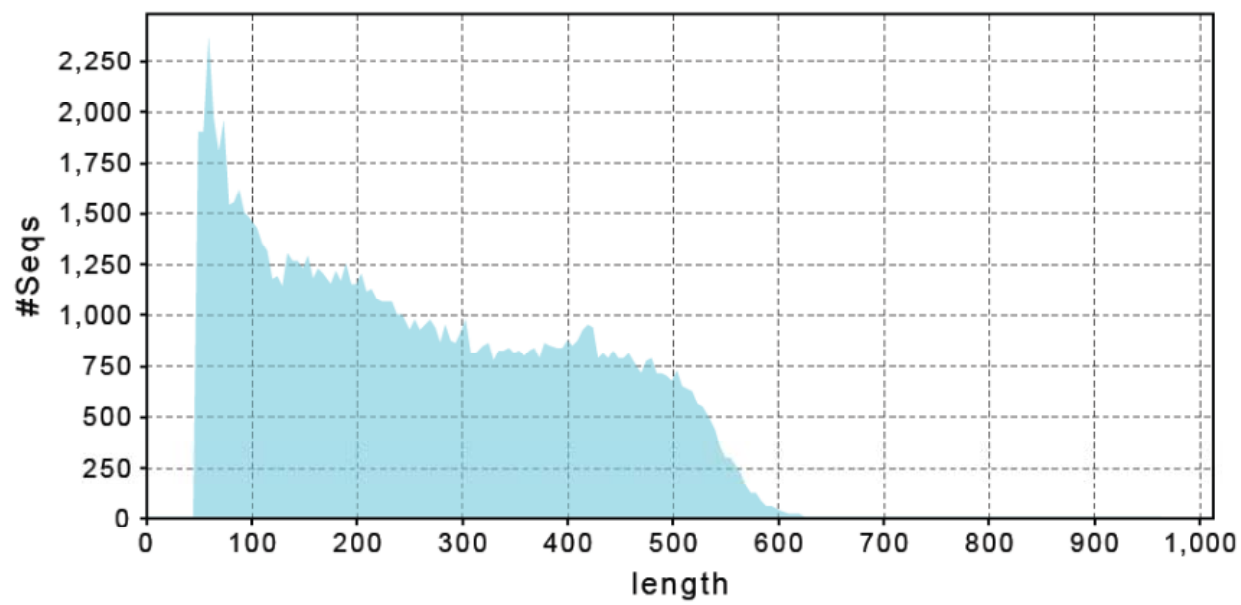

Figure 3S A

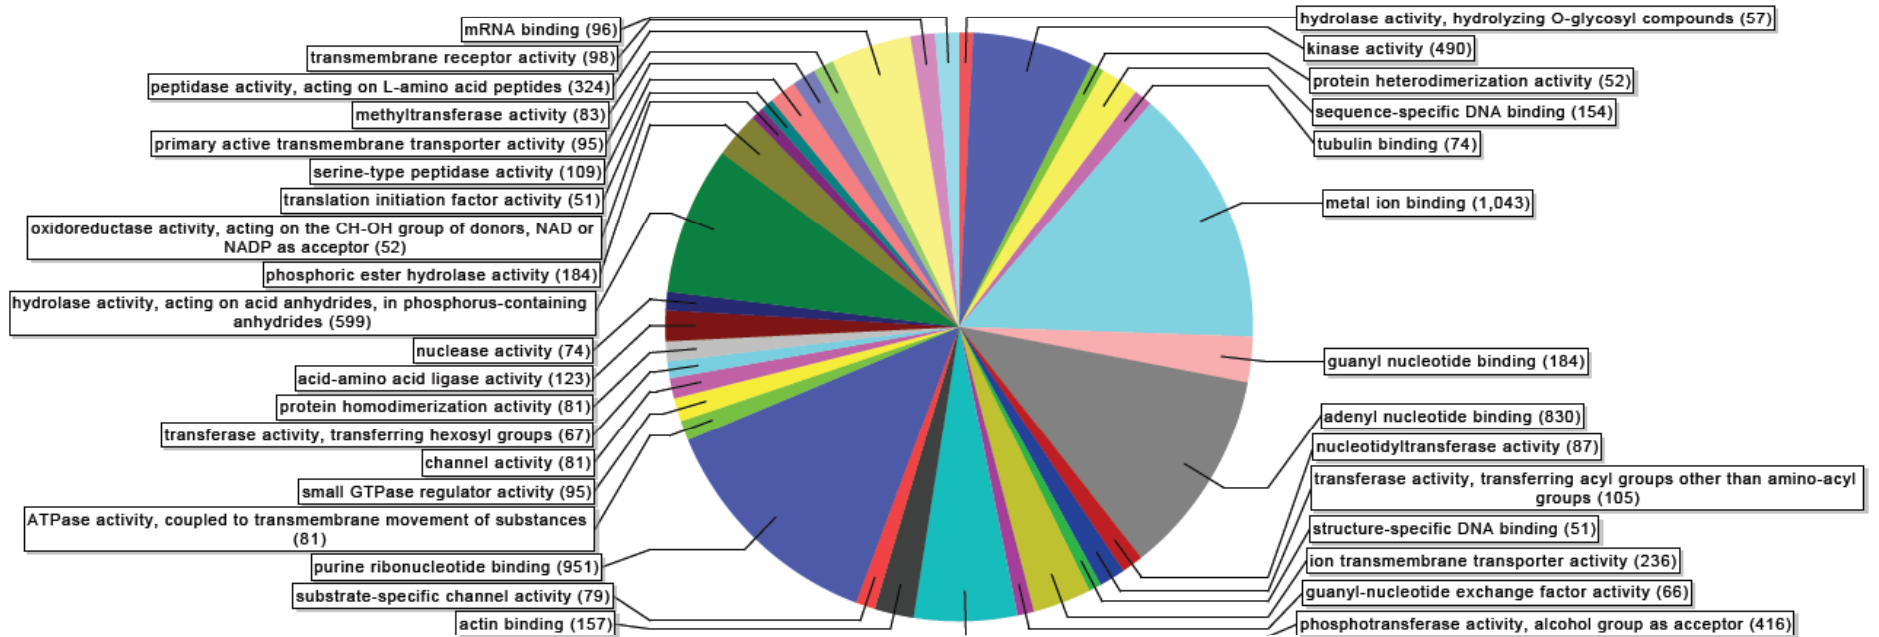



Figure 3S B

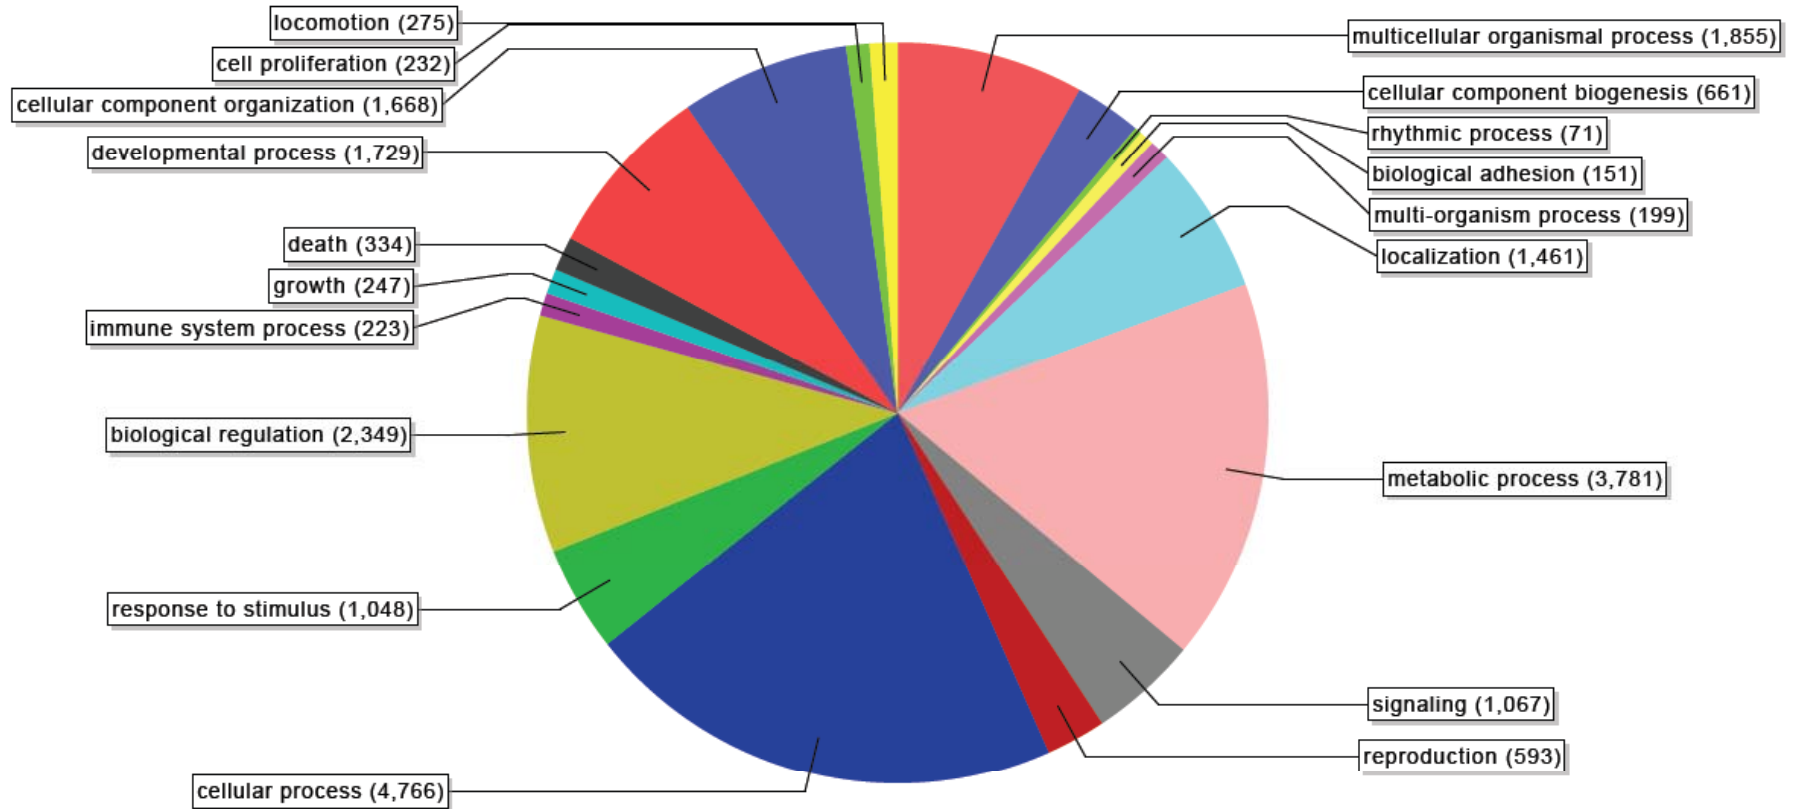

Figure 3S C

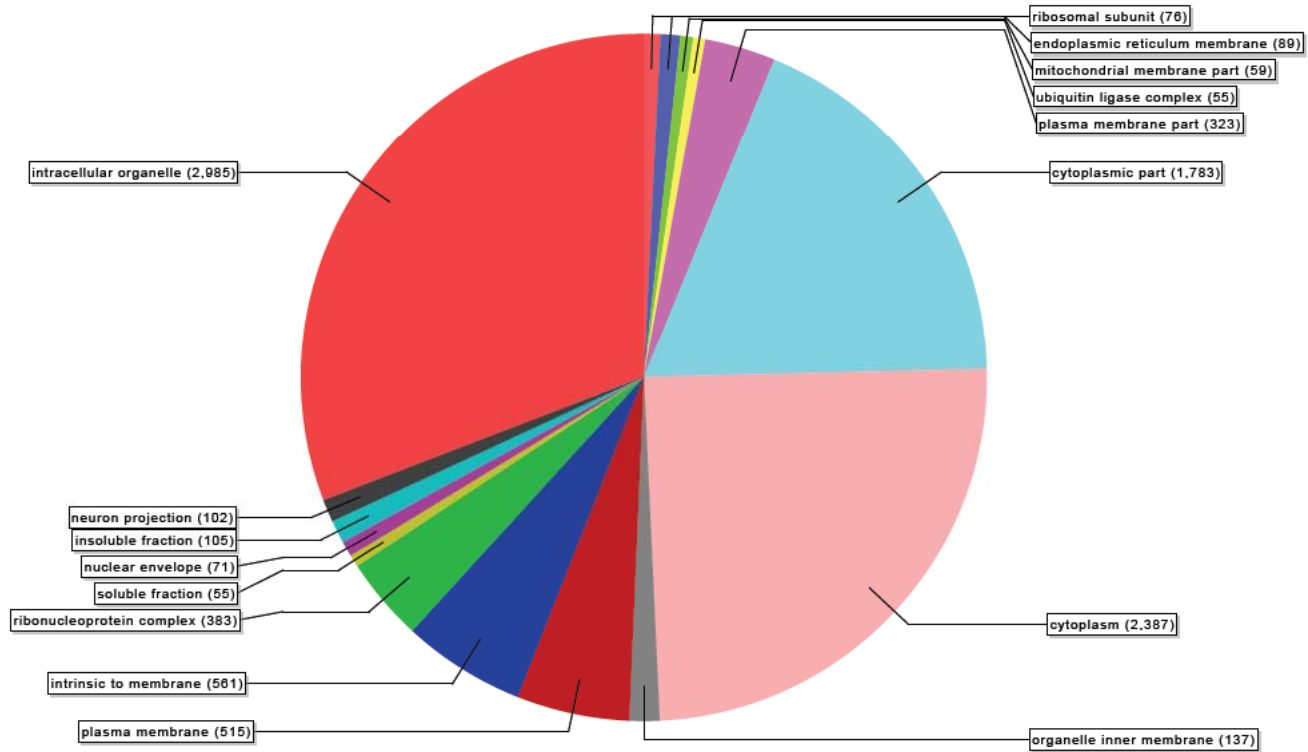

Figure 4S

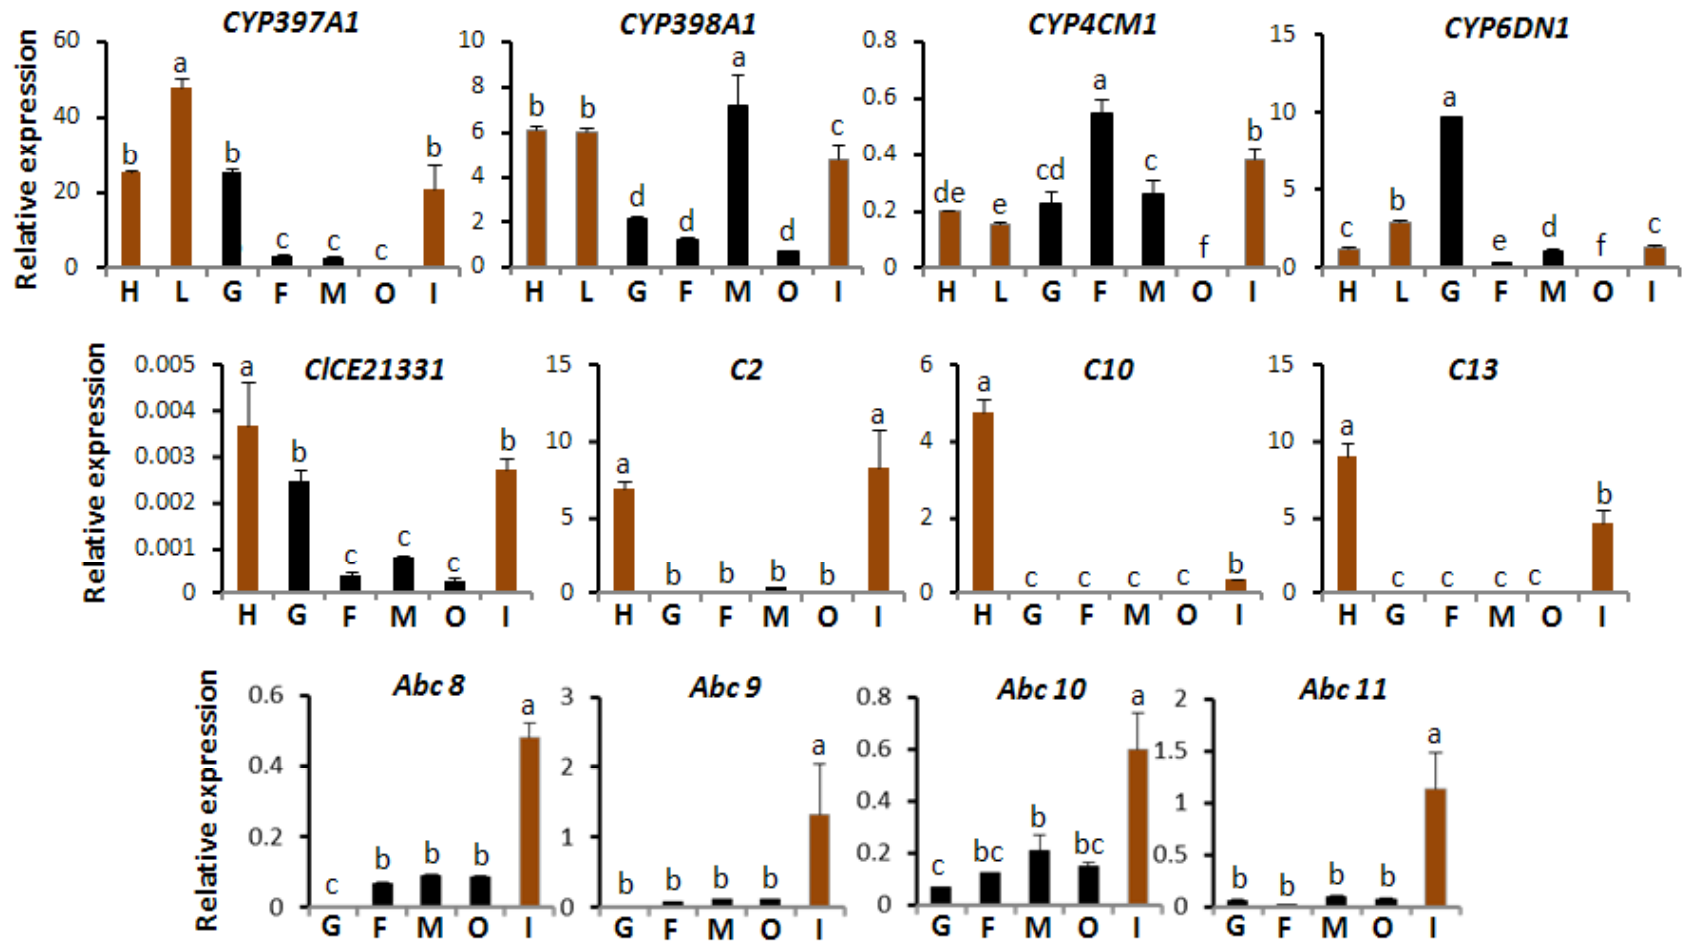

Figure 5S

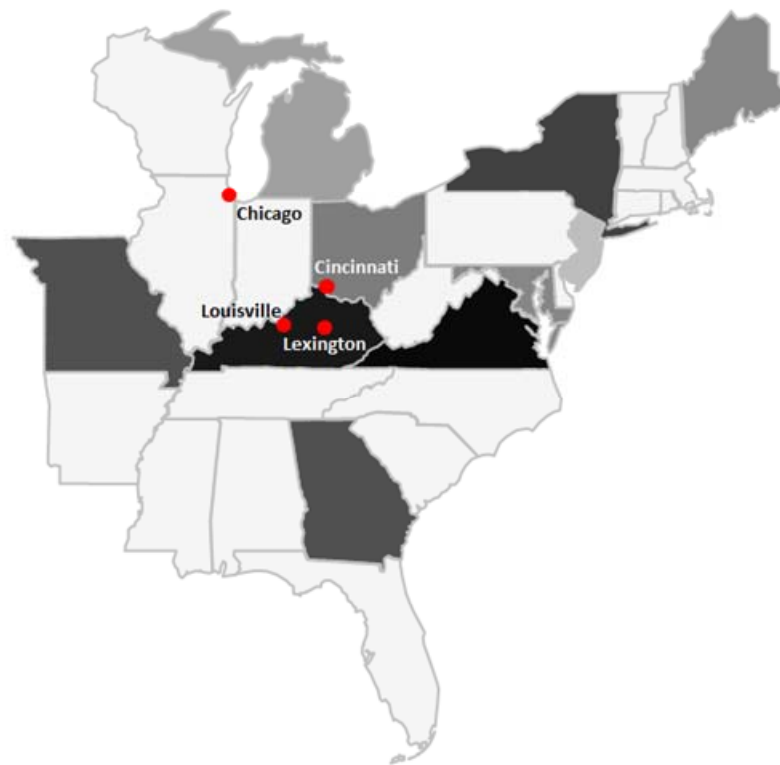

Figure 6S

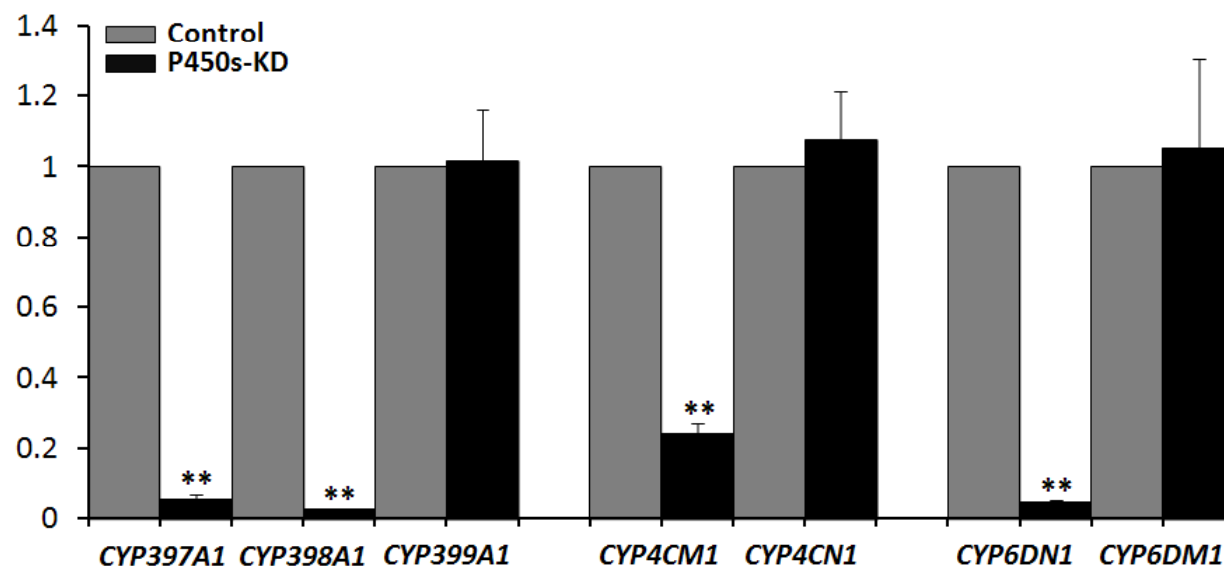

Supplement: srep01456-s1.pdf [file srep01456-s1.pdf]
